# Supplementary material for: Natural history of S-adenosylmethionine-binding proteins
Source: Springer Nature journal article supplement (doi:10.1186/1472-6807-5-19), 2005-10-14

**A**

|             |                         |           |          |              |              |                |                |         |           |    |
|-------------|-------------------------|-----------|----------|--------------|--------------|----------------|----------------|---------|-----------|----|
| human_N     | SSSSSSSS                | SSSSSSSS  | SS       | SSSSSS       | S            | SSSSSS         | SSSSSSSS       |         |           |    |
| leishm_N    | TEKLLLEWVSR             | QCQSIQSVT | 0        | KTD          | KQEAAYLV     | 0              | SESSMFFVSK     | 0       | RRFILK    | CG |
| yeast_N     | PEKRLLELVILRC           | NAQIVSRE  | 0        | SNE          | YINSYVLL     | 0              | TESSELLVMK     | 0       | NRILLI    | CG |
|             | PEKLLLEIWFPP            | KCEVLSMK  | 0        | KTK          | ELDAFLL      | 0              | SESSLVFFD      | 0       | HKLTMK    | CG |
| human_C     | ssssssssssshhhhh sss    | ssssss    | s        | ssssssssss   | ssssssssss   | ssssssssss     | ssssssssss     |         |           |    |
| leishm_C    | PDQTLLEILMSELDPAVMDFYF  | 19        | IPGSVIDA | 2            | FNPCGYSMNGMK | 1              | DGYIWTIHTPEPE  | 0       | FSYVSEFN  | NL |
| trp         | DDTQLSMTMYGLDKEQTKHWF   | 25        | GSWTLHDL | 1            | FEPCCYSINAIR | 0              | DEYQTMHTPEDH   | 0       | CSFASYEN  | T  |
| DCAM_XEAT   | DDTLEEVLMTELDPECAKFCV   | 36        | NSAQDSDL | 8            | FTPCCYSNMIL  | 1              | EKYIYTIHTPEKG  | 0       | WSYASFENI | T  |
| DCAM_XENLA  | PDQTLLEILMSELDPEVMDFYF  | 19        | ITGSVIDA | 2            | FSPCCYSMNGMK | 1              | DGYIWTIHTPEPD  | 0       | FSYVSEFN  | NV |
| DCAM_DROME  | PDQTLLEILMQDLDPETMSIFYK | 19        | LPTMHIDD | 2            | FDPCCYSMNGIN | 1              | KGEYMTIHTPENQ  | 0       | FSYVSEFN  | NV |
| s2          | PDHTEILMSLDLDEEVLHKFTK  | 21        | AGADVHDE | 1            | FDPCCYSMNAYM | 2              | TDQYATIVTPEKA  | 0       | FSFASFE   | NQ |
| SPEH_ARCFU  | hhhhhhh                 | VEEVVDKA  | 11       | FNPHGVIGIVLI | 0            | AESHVSIHTWPEYG | 0              | LVNLDIF | CG        |    |
| SPEH_AERPE  | FGLHVYGNFYC             | 15        | VLEAAREG | 10           | KIGEVSVAI    | 0              | LESHITVHTWPEYR | 0       | FATVDVY   | CG |
| SPEH2_AERPE | VGKHVYGSLYG             | 15        | VVRAESA  | 12           | GEKGVSVIVLV  | 0              | LESHLALHTWPEYD | 0       | YATFDIY   | CG |
| s3          | LGKHLILELWG             | 15        | LVDSVKAC | 11           | FSPQAGTGAVAL | 0              | AESHIAHTWPEYG  | 0       | YAALDVF   | CG |
| SPEH_THEMA  | LGRHLVAFEYE             | 15        | MQAAYES  | 11           | FLPYGVSGVVI  | 0              | SESHLITHTWPEYG | 0       | YAADLVY   | CG |
| SPEH_THEVO  | VGIHLIADFYG             | 15        | IEGAVKYG | 11           | FRPQAGSVVLL  | 0              | AESHLSEHTWPEYG | 0       | LVTLDIY   | CG |
| s4          | VGEHLLLDLYG             | 15        | LREAADAL | 21           | EAGGVTGVLL   | 0              | AESHLSEHTWPEHG | 0       | FAADAFMG  | CG |
| SPEH_PYRAB  | IGHHYIVEAAG             | 15        | FLEAAKRG | 11           | FSPMVSQVIV   | 0              | AESHISVHTWPEKG | 0       | YAADLVY   | CG |
| SPEH1_PYRAE | VGRHVYGNLYG             | 15        | VKEAVKVA | 12           | GPGLLTVFAV   | 0              | AESHISHTWPEHG  | 0       | FATVDVY   | CG |
| SPEH_PYRHO  | IGHHYIVEAAG             | 15        | FLEAAKRG | 11           | FSPMVSQVIV   | 0              | AESHISVHTWPEKG | 0       | YAADLVY   | CG |
| SPEH1_SULSO | IGKHVYGNLYD             | 15        | VLEAVDIA | 13           | GKKGVSIVAL   | 0              | EESHIAHTWNEYN  | 0       | YALDVIY   | CG |
| SPEH2_SULSO | VGKQVYGSLYE             | 15        | IKEAADIG | 10           | KIGEVSVAI    | 0              | LESHITHTWPEYR  | 0       | FATVDVY   | CG |
| SPEH_AQUAE  | LGLHLIADLYG             | 15        | LEGAVKYA | 11           | FQPHGATGVLL  | 0              | AESHISHTWPEHG  | 0       | LATVDVY   | CG |
| SPEH1_BACHD | MGRHVIAELWG             | 15        | FVDAALKA | 11           | FAPQGISGVV   | 0              | SESHLTHSFPPEHG | 0       | YASIDVY   | CG |
| SPEH_PSEAE  | LQKQLVIELDF             | 15        | MLEAARQA | 11           | FSPIGISGVV   | 0              | AESHLAHTWPEYG  | 0       | YAADLVF   | CG |
| SPEH_SALTY  | LKLHGFNNTK              | 33        | RLTEILSE | 16           | YEPQASVTILV  | 27             | DKSHICVHTYPESH | 8       | RADIEVS   | CG |
| SPEH_PSEAE  | LKLHGFNNTK              | 33        | RLTQILTD | 16           | YDPQASVTILV  | 27             | DKSHITVHTYPEIH | 8       | RVIDIVS   | CG |
| SPEH_YERPE  | LKLHGFNNTK              | 33        | RLTEILSE | 16           | YDPQASVTILV  | 27             | DKSHICVHTYPESH | 8       | RADIEVS   | CG |
| SPEH_CLOAB  | LKLHGFNNTK              | 33        | RLTEILTN | 16           | YDPQASVTILV  | 29             | DKSHITVHTYPEYH | 8       | RADIEVS   | CG |
| SPEH_BUCAI  | LKLKYGFNNTK             | 33        | RLTKLLKK | 16           | YEPQASVTILV  | 26             | DKSHICVHTYPESH | 8       | RADIEVS   | CG |
| SPEH_XYLFA  | LRLQGFNNTK              | 33        | RLTQILTD | 16           | YDPQASVTILV  | 24             | DKSHITVHTYPETH | 8       | RADIDVA   | CG |
| SPEH_ECOLI  | LKLHGFNNTK              | 33        | RLTEILSE | 16           | YEPQASVTILV  | 27             | DKSHICVHTYPESH | 8       | RADIEVS   | CG |

**B**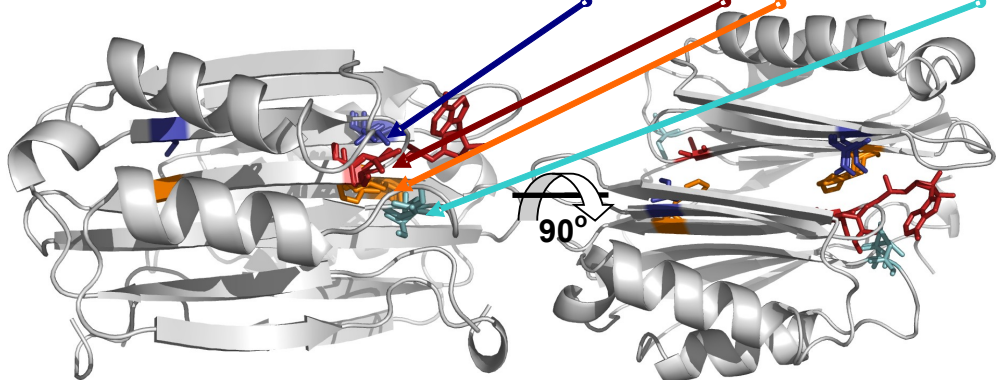

Supplement: 12900_2005_52_MOESM5_ESM.pdf [file 12900_2005_52_MOESM5_ESM.pdf]
