# Supplementary material for: Natural history of S-adenosylmethionine-binding proteins
Source: Springer Nature journal article supplement (doi:10.1186/1472-6807-5-19), 2005-10-14
Supplement: 12900_2005_52_MOESM3_ESM.pdf [file 12900_2005_52_MOESM3_ESM.pdf]

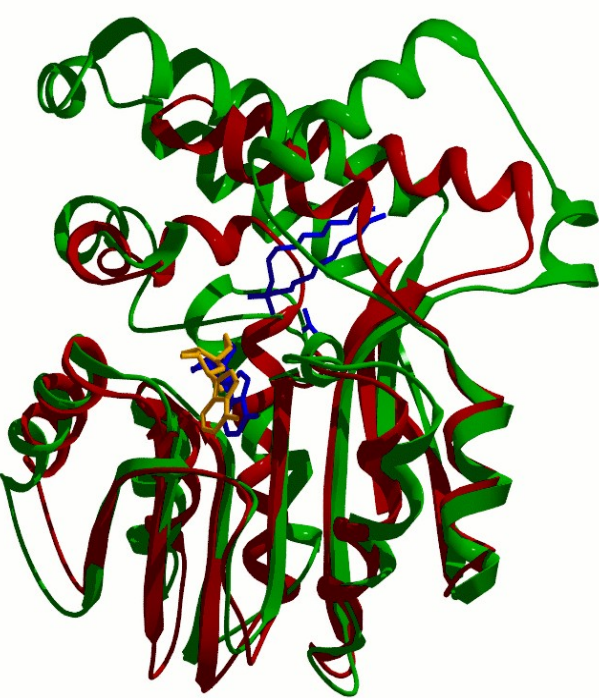

```

10      20      30      40      50
1IM8 ( 19) fdenVAevFpd Iq---rSvPgy-----snIitaIG lAer-fVta
1KPI ( 23) HYdksneFFkLWL DpsMTYSCAyferpdmtleeAQyaKrklALdkLnLep
          aaa                aaaaaa  aa

          ← motif-I → 70          ← motif-II → 100
1IM8 ( 56) dSnVYDLGCSrGaATLsArrnInqpnvKliGIDnSqP VerCrqhiaayh
1KPI ( 73) gmtLLDIGCGWGsTMrhAvaeyd---VnVIGLTLSenQyahDkamfdevd
          bbbbb      aaaaaa      bbbbb      aaaaaaa

          ← motif-III → ← motif-IV → 140 ← motif-V
1IM8 (106) seipVeIlCnDIRhyeIknAS VILNFTLQfLp-----pedRialLtk
1KPI (120) sprrkeVriqGWEeFdepVd-RIVSLGAFEHFAdGagdagfeRYdtFFkk
          bbbb          bbb 333          aaaaaaa

motif-V ← motif-VI → 170      180      190      200
1IM8 (149) IyegLnprnGVLVLSekFrfed-----tkin-----hllidlHhqf
1KPI (169) FynlTpddGrMLLHTITipdkeeaqelgltspmsllrfik-----
          aaa      bbbbbbb      a

          210      220      230      240      250
1IM8 (184) krangYselevsqkRtalenv rtdsietHkvrLknvgFsqVelwfgcf-
1KPI (209) -----filteIFpgGrLPrisqVdyySsnagWkVeryhriGan
          aaaaa      aaaaaaaaaa      bbbbbbb

          260      270      280      290      300
1IM8 (233) -----NFGS
1KPI (247) YvpTLnaWAdaLqahkdeAialkgqetCdiYmhYLrgCSdlFrdkyTdVC
          bbb

1IM8 (238) -iAvk
1KPI (297) QFTLv
          bbb

```

solvent inaccessible  
solvent accessible  
α-helix  
β-strand

UPPER CASE X  
lower case x  
red x  
blue x

hydrogen bond to main chain amide  
hydrogen bond to main chain carbonyl  
positive phi  
3 - 10 helix

**bold** x  
underline x  
*italic* x  
maroon x
