# Supplementary material for: Natural history of S-adenosylmethionine-binding proteins
Source: Springer Nature journal article supplement (doi:10.1186/1472-6807-5-19), 2005-10-14
Supplement: 12900_2005_52_MOESM4_ESM.pdf [file 12900_2005_52_MOESM4_ESM.pdf]

| gi#      | COG/KOG# | name        | species |     | motif-1                                                                                    |                            | motif-2 |                            | motif-3   |
|----------|----------|-------------|---------|-----|--------------------------------------------------------------------------------------------|----------------------------|---------|----------------------------|-----------|
| 18409989 | KOG4355  |             | ARATH   | 206 | CLGASTYK(6)---HLGSHYVDSLVEFRVTVSEG---VKEIWLSS---ED(14)LLNA---IVKELPSDQSTML---RIGMTPPF      | hhhhhhhhhhhhhhhhhhhhhhhhhh | sssssss | hhhhhhhhhhhhhhhhhhhhhhhhhh | ss--sssss |
| 7299338  | KOG2492  |             | DROME   | 250 | CDNMITYI(11)PLASIVAEVKALAEQGVKEVTL(6)YDRRTAQE(6)AT(14)GTPFAAL-LRSVAQAVPDMRI---RFTSPHPKD    |                            |         |                            |           |
| 2501533  | COG0621  | Y019_HAEIN  |         | 156 | CNKYTFV(11)PVDDVLFELIAQLAEQGVREVNLLG---QNVNAYRG---PT-HDGGQICSPAE-LLRVLVASIDGID---RIRFTTSHP |                            |         |                            |           |
| 20094331 | COG1032  |             | METKA   | 196 | CPFRCLFA(5)-GPKWRGKSPDRVVEIISYLVVELG---VERLEFVD---DV-FTAHKRRVRE-ICEKMR---GIDVWPDCG         |                            |         |                            |           |
| 15896586 | COG4277  |             | CLOAB   | 63  | CIYDQYV(5)-DTPRASFTPRELADLTMNFVRRNY---IEGLFVDS---GV-MKNPDYTCQK-FMEELRILRYEY---NFGYIHDG     |                            |         |                            |           |
| 3913815  | COG0635  | HEMN_AQUAE  |         | 60  | CEQRQYLG(10)-IEPPLYERVCREMDLVSQYLKDKR-KVILQHWGG---GTPNVLSPQEKW-FBEIKRRFEPGDNAEISIEDLPR     |                            |         |                            |           |
| 14520767 | COG2100  |             | PYRAB   | 124 | CNMRCIFAS(9)-RKLDFVVDIDYLLKWFDDWVAKK(4)EAHLDAQG---EPLLYPFIVE-LVQALREHPHVS---VISMQSNV       |                            |         |                            |           |
| 11499591 | COG0535  | NirJ2_ARCFU |         | 123 | CNLRKHF--(5)-KPLQDELTTDEALEITDK-LDRLG-VTTIIAFSG---GE-PLVRRD---IFELTRYAAEAKGI---YVAIATNGT   |                            |         |                            |           |
| 15833984 | COG0641  | AslB_ECOLI  |         | 108 | CNLDNYF(9)-EKPVTHMDDTLEAYVRRHYI(4)EVAFTWQG---GEPTLLGLEFVYRAVALQAKYAGRKI---SNSFQT-NG        |                            |         |                            |           |
| 549552   | COG0820  | YFGB_ECOLI  |         | 124 | CEHGKFS(13)EIEIGQVWRAAKIVGAQKVTGQRP---ITNVMMG-MGE-PLNLNINNVV-AMBIILDDFGFG(4)IRVTLST-SG     |                            |         |                            |           |
| 15606957 | COG2516  |             | AQUAE   | 54  | CHATCAYG(15)RVEWPTVKTDEIERTKQVGH----AERLCISQ---IT-HPRAIRDTKY-ILEKVRHRELGDKIFISILLNA-TG     |                            |         |                            |           |
| 1705463  | KOG2900  | BIOB_ARATH  |         | 93  | CSBDQSYSP(8)-VKAQRILMSKDAVIDAAKK-AKEAG---STRFCMGA-AWRDTIGRKTNSQ-ILBYIKERIGMGM---EVCCTL--G  |                            |         |                            |           |
| 15606163 | COG1060  | ThiH_AQUAE  |         | 66  | CIAGKHF(6)-DEDAYVLDMDTILQVKELVEWGG---TTLMOG---GINPDLPLEFYED-MISQIKKHFPV---QIHCFSAPE        |                            |         |                            |           |
| 19705171 | COG1509  | KamA_FUSNN  |         | 126 | CSMYKFT(6)---SSDDAMPMDRIDKAIETVAKTPQ---VRDVLLSG---GDALLVSDKKLW-IIQKLRAPHVE---IIRIGSRTP     |                            |         |                            |           |
| 18313168 | COG1313  | PflX_PYRAE  |         | 158 | CNFRVYQ(6)-FSESGIEVTAALAAIQAKLREEG---ARNINWVG---GE---PTPNIPY-ILESRLILARRGV---NVPQLWNSN     |                            |         |                            |           |
| 730103   | COG2896  | MOAA_BACSU  |         | 26  | CNFRITYM(11)LKKEELLSFEELERLATLFTVTRFG---VEKIRLTG---GE---PLMRKDMPE-LIKKLARIPGR---DIAMTTNG   |                            |         |                            |           |
| 22027536 | KOG2876  | MOCS1_HUMAN |         | 79  | CNLRQY--(8)-TPKANLLTTEILLARL-FVKEG---IDKIRLTG---GE---PLIRPDVVD-IVAQLORLEGLR---TIQVTT-NG    |                            |         |                            |           |
| 14521276 | COG2108  |             | PYRAB   | 46  | CPRNFYF(11)ANERPVRSKDIIEAKIQDARGA---GITG---GD-PLARLSRIVEYIRLLKEEFGKFF---HHLYT-TG           |                            |         |                            |           |
| 22001767 | COG0320  | LIPA_YERPE  |         | 93  | CTRRPFQDV---AHGRPVTPDANEPEKLAQTTQDMG---LRYVVITS---VDRDDLDRGGAQH-FADCSATRANKP---TKIETLVP    |                            |         |                            |           |
| 17865692 | COG0502  | BIOB_SALTY  |         | 52  | CPEDQKYSP(8)-LEAERLMEVQVLDLSARK-AKNAG---STRFCMGA-AW---RNPHERMEY-LEKIVQGVKAMGL---ETCMLT--G  |                            |         |                            |           |
| 14520966 | COG1180  | PflA_PYRAB  |         | 81  | CNMHKHQ(6)-ADENFPYLODAPTEAVTLAKHYE-CESIAITY---NE---PTIWFY-VLDTAKLAKKEGL--NNVIL-NG          |                            |         |                            |           |
| 13476168 | COG1533  | SplB_RHILO  |         | 74  | CEHGQYF(14)DFETKLFAPDARLLDKELSGEYQPTTIAIGT---NT(4)PIEKQYRI-MREILVELEARGH---PVGIVTKSA       |                            |         |                            |           |
| 15605904 | COG1856  |             | AQUAE   | 69  | CELMDDHASKILWHMIPATTPPELVKVGED-LKKKG---IEGVLSIG---GS-DKNGFVPLWD-FFDAMKYLKEEL---GFLLTCHVG   |                            |         |                            |           |
| 15643710 | COG5014  | THEMA       |         | 710 | CKFLCAYW(8)-KRAGDLSPEEVAERLLEISKKRK---CDLFRISG---AE-PILGRRSAEH-VRKVIELVNN---TFILET-NG      |                            |         |                            |           |
| 15891589 | COG0602  | NrdG_AGRT5  |         | 43  | CDYRQSWD(6)-SEYRDTWKPMQVVEIQLQEVLLGSLGGMPLTVSLSG---GN-----PAIQP-LGTLIAKQGEQY---RFALETQGS   |                            |         |                            |           |

| gi#      | COG/KOG# | name        | species |     | motif-4                                                                                                               |       | motif-5 |            | motif-6           |
|----------|----------|-------------|---------|-----|-----------------------------------------------------------------------------------------------------------------------|-------|---------|------------|-------------------|
| 18409989 | KOG4355  |             | ARATH   | 206 | II(5)EIAAV(4)CVYTFELHVPVQSGSD---SVLTAMNREYTASEFRVTVDT---LT---ELVPG---MQIATDIIIC-GFPGETDEDFSQTV(5)-YKFPQVHISQFYPR(208) | hhhhh | sssssss | hh--hhhhhh | hhhhhh-hh---hhhhh |
| 7299338  | KOG2492  |             | DROME   | 250 | FI(5)EVIRD-HPNVCKQLHLPAQSGNT---QVLERMMRGYSREAYLELVQH---IR---QFLPN---VGLSSDFIC-GFCGETEEEFQDTVSL---IQQQVYNVAYLFAY(129)  |       |         |            |                   |
| 2501533  | COG0621  | Y019_HAEIN  |         | 156 | II(7)DYIRD-TPELVKFLHLPVQAGSD---EVLTKMKRAHTALEYKSIIRK---LR---AVRPD---IQISSDFIV-GFPGETAEDFQTMNL---IAQVNFDMFSFVY(135)    |       |         |            |                   |
| 20094331 | COG1032  |             | METKA   | 196 | A(7)ELART(4)GCRTVYVGAESASN---RTLTKRINKGIT---VQDVIACRKVA---KRHG---LIRLLSFIL-GFPWEDREDVFTI(5)-LEPDYQVFTVCTPY(86)        |       |         |            |                   |
| 15896586 | COG4277  |             | CLOAB   | 63  | A(5)DTLID(4)LCDRM-SVNIELPSQ---KSLKLLAPNKS(6)PMGYIKN-KIS---ENTT(13)AGQSTQMIIGATPDTD(5)LTESLYSK-YLKRVRFFSAYMPV(181)     |       |         |            |                   |
| 3913815  | COG0635  | HEMN_AQUAE  |         | 60  | YLTDQIKA(4)GFNRI-SLGVQDLDP---KVQAVNVRQP(6)KMEKLE---AGFES---INLLDIY-GLPYTKSEFKT(7)-PDRIATYGFYAIYPQ(208)                |       |         |            |                   |
| 14520767 | COG2100  |             | PYRAB   | 124 | LLNDKLVVE(4)GLDRV-NLSHSLD---PEKAKMLMGIK(6)VLEMAEA-LV---NAGID---VLIAPVMF-GVNDDE(6)FARRIGV-KRPWALGFQNYIYP(110)          |       |         |            |                   |
| 11499591 | COG0535  | NirJ2_ARCFU |         | 123 | LITEEIAKR(4)GVYV-QISLDGMK---EETHAEFRGIR---GCFDKIVEG---IR---NAVKTG---LNVNMSVTIRRYNHEVPKVVLELCEK---LGVNWFMHYNIPT(177)   |       |         |            |                   |
| 15833984 | COG0641  | AslB_ECOLI  |         | 108 | V-LLDDEWC(4)ENHFLVGLSLDGPAAEI-HNQYRVTKGGR-PTHKLVMA---LT---L-LQK---HHVDYNVLV-CVNRTSAQQPLQVYDFLCDAGVEF---IQFIPV(210)    |       |         |            |                   |
| 549552   | COG0820  | YFGB_ECOLI  |         | 124 | V(4)DKLGD---MIDVALAISLHAPND---EIRDEIVPINKKYNIETFLAA---VR---RYLE(7)-RVTIYVMLDHVNDGT(5)LAELLK---DTPCKINLIPNMPF(70)      |       |         |            |                   |
| 15606957 | COG2516  |             | AQUAE   | 54  | H-TYEDLED(4)GAETL-TVALDAAT---PELFEKLRGR(6)WETYVQV---LEWACINDG---GHVGAHLV-GLGETEE-MVRTIQRVRLDGGRTLHFSWPE(130)          |       |         |            |                   |
| 1705463  | KOG2900  | BIOB_ARATH  |         | 93  | MIEKQQALE(4)GLTAY-NHNLDSR---EYYPNVITTR---YDRLET---LS---H-VR(3)-INVCSGGII-GLGEAE(5)LLHTLATLPSHPSPVINALLVA(107)         |       |         |            |                   |
| 15606163 | COG1060  | ThiH_AQUAE  |         | 66  | II(13)VIRR(4)GLMSIPGGGAELISQ---EVRDKISPGKC(4)WEVVRT---AH---R-LG---MTTATMMF-GHVESI(5)HLERVRKIQDETGGF---TAFIPW(109)     |       |         |            |                   |
| 19705171 | COG1509  | KamA_FUSNN  |         | 126 | V---VLPQ(4)ELCNM---LKKYH---PIWLNTRHPN(6)AKKACEM---LA---DAGVP---LGNQTVLLR-GINDSPVP-MKRLV---HDLVMMVRVYIY(132)           |       |         |            |                   |
| 18313168 | COG1313  | PflX_PYRAE  |         | 158 | M-YLTPEGL(4)HVIDWLDPFKYGN---DAHALRYSVAP-RCWETVTRNFVSI---CKRE---DIIVRHLVLPGHVECTKPLRWL---AENCNHALVNIIMDQ(44)           |       |         |            |                   |
| 730103   | COG2896  | MOAA_BACSU  |         | 26  | L-LPVYAKR(4)GLKRV-TISLDSLE---DERFKKINGRG(6)LEGIEAA-KQ---AGLG---KIVNMVQK-GVNEKD---ILPMARYFKEGHILRFIEFMDV(137)          |       |         |            |                   |
| 22027536 | KOG2876  | MOCS1_HUMAN |         | 79  | II(6)PQLQK---AGLSAI-NISLDTLVPKAFEFIVRRKGFH-KVMEGIHKA---IE---LGYNP---KVCNVVMR-GLNEDELDFAAALTEGL-PLDVRF---IEYMP(133)    |       |         |            |                   |
| 14521276 | COG2108  |             | PYRAB   | 46  | II(4)EALEK(4)GLDEI-RFHDPDLQPNKSKFEREIEIN(6)WDVGGEV-PAV---PGFE(8)-LLDKLGAKFLNINELE(5)LRALL(13)IKGSLEMGLKVLWEW(122)     |       |         |            |                   |
| 22001767 | COG0320  | LIPA_YERPE  |         | 93  | D(5)DRALD(4)TPPDVFNHLENVP---RVYRQVRPGAN-YDWSLKLE-RFK---EAHPD---IPTKSGLMV-GLGETN(5)VMHDLR---HGVTMITLQGLVQ(53)          |       |         |            |                   |
| 17865692 | COG0502  | BIOB_SALTY  |         | 52  | MLNESQAQR(4)GLDYV-NHNLDTSP---EFYGNIIITRT---YQERLDT---LE---K-VR(3)-IKVCSGGIV-GLGETV(5)LLQLANLPTGSPSPVINMLQV(118)       |       |         |            |                   |
| 14520966 | COG1180  | PflA_PYRAB  |         | 81  | Y-INEEPFR(4)YIDAM-NIDKAFDD---RFYMKIASVNP-GEPSRRIAK-IAK---KEFGI---HVELYLIIPTLNDKE(5)FARVWDELGGPTPVHFSRFFPH(90)         |       |         |            |                   |
| 13476168 | COG1533  | SplB_RHILO  |         | 74  | II(5)DILSR(4)GLAKV-ALSVTLD---RMLARTMEPRA-STPTKRLEA---IR---Q-LS(5)-TSVMVAPIIPGLTDOE---MERILDSAYAAGARE------(99)        |       |         |            |                   |
| 15605904 | COG1856  |             | AQUAE   | 69  | L(6)EKLE---ANVDV-LLDIIGDN---ETIAQVYKLPH-KSVEDYDRS---LR---L-LK(3)-LRIVPHVI-GLHYGK(6)AIDMIAK---YEPDALVLVVMYPY(99)       |       |         |            |                   |
| 15643710 | COG5014  | THEMA       |         | 710 | L-----MFGFDPSL-----VD---L-FVN---LNVLIRVSVIKGWDEES---FEKITGASGEYFRY(50)                                                |       |         |            |                   |
| 15891589 | COG0602  | NrdG_AGRT5  |         | 43  | II-----AK(4)DLDDL-VLSPKPPS-----SGME-TDWAQFEDC---LA-----AAGDG---PQVALKVVII---FDDADYA-YAKAA(5)-HLPVYLQPGNHTPP(49)       |       |         |            |                   |
