# Supplementary material for: Natural history of S-adenosylmethionine-binding proteins
Source: Springer Nature journal article supplement (doi:10.1186/1472-6807-5-19), 2005-10-14
Supplement: 12900_2005_52_MOESM6_ESM.pdf [file 12900_2005_52_MOESM6_ESM.pdf]

| gi#      | species | sssssssss | 14*   | hhhhhhhhhhhhhhhhhh | 42              | sssss-----sss | s---ssssssss  | 55                 | hh---hhh---hhhhhhhhh    |               |          |             |         |
|----------|---------|-----------|-------|--------------------|-----------------|---------------|---------------|--------------------|-------------------------|---------------|----------|-------------|---------|
| 46015497 | ECOLI   | KHLFTS    | ESVSE | GHDPDKIADQ         | SDAVLDAILE      | ---QDPKAR     | ACET---YVKTGM | ---ILLGGEIITSAWVD  | ---IEE---ITRNTVREIGYVHS |               |          |             |         |
| 400245   | HUMAN   | TFLFTS    | ESVSE | GHDPDKICDQ         | SDAVLDAHLQ      | ---QDPDAK     | ACET---VAKTGM | ---VLVAGEIITSRAAVD | ---YQK---VVREAVKHIGYDSS |               |          |             |         |
| 15836994 | XYLFA   | SYLFTS    | ESVSE | GHDPDKVADQ         | SDAVLDAILV      | ---QDPRAR     | ACET---MVKTGV | ---AIIAGEIITSAWVD  | ---LEA---LTRKVIIVDIGNSS |               |          |             |         |
| 6016553  | CAEEL   | KFLFTS    | ESVSE | GHDPDKMCDQ         | SDAVLDAHLK      | ---QDPNAK     | ACET---VTKTGM | ---VMLCGEITSKAVVD  | ---YQV---LVRRLVLEKIGTDS |               |          |             |         |
| 22095828 | FUSNN   | FTYFTS    | EFVSP | GHDPDKISDQ         | SDAILDAACLK     | ---DDPNSR     | ACEV---FCTTGL | ---VVVAGEIITSTYID  | ---VQD---IVRKKIIDEIGYRP |               |          |             |         |
| 13357974 | UREPA   | KKIITS    | ESVAG | GHDPDKICDQ         | SDAILDECLA      | ---QDKNSR     | ACEV---LACNRL | ---IIVAGEIITTHAYVD | ---VVK---TAWEIIKPLGYNEN |               |          |             |         |
| 2500686  | MYCPN   | WGRYVA    | EAVGR | GHDPDKICDQ         | ADSILDECIK      | ---QSPTSH     | ACEV---FASKNL | ---IMVAGEIILTGYVD  | ---VVQ---TGWKVLNRLGYTEN |               |          |             |         |
| 3334428  | METJA   | RPTEIV    | ERKGL | GHDPDISCDG         | AESVSRALCK (13) | TQVEL         | GGHA (8)      | MVSPYI             | ---ILLSERATMEILDK (4)   | VIK (5)       | TAVKAAKE | ---YLKK     |         |
| 21646472 | CHLTE   | QPFELV    | ERKGI | GHDPDTICDS         | MEAVCIDLCR (13) | TKGLL         | AGRS          | ---LPKTGG (7)      | KLIFG                   | DRATYTCNG (4) | VGE      | ---IAEAAAKR | ---WIRE |

| gi#      | species | sssssss | 16*  | hhhhhhhhhhhhhhhhhh | 42             | sssssss    | hh---hhhhhhhhhhhhhhhh | 163*        | 165*        |         |            |            |       |          |      |          |          |       |        |       |       |       |
|----------|---------|---------|------|--------------------|----------------|------------|-----------------------|-------------|-------------|---------|------------|------------|-------|----------|------|----------|----------|-------|--------|-------|-------|-------|
| 46015497 | DM (8)  | VLSA    | IGKQ | SPDINQGVDR (5)     | QGAGDQGLMF     | SYATNE     | DVLMPPAP              | ---ITYAHLR  | VQRQAEV     | RKN     | ---GTLPLWR | LPDAK      | SOVT  | FQY (5)  | VG   | LD       | AVV      |       |        |       |       |       |
| 400245   | SK (8)  | VLVALE  | EQQ  | SPDIAQGVHL (6)     | IGAGDQGLMF     | SYATDE     | TEECMLPT              | ---IVLAHKL  | NAKLAEL     | RRN     | ---GTLPLWR | LPDPSK     | TOVT  | VQY (10) | R    | VH       | TIV      |       |        |       |       |       |
| 15836994 | DV (8)  | VLNL    | IGKQ | SPDINQGVDR (5)     | QGAGDQGLMF     | SYATNE     | DSYMPAA               | ---IHISHRL  | VEQAQ       | AKIRKKS | NSPLWR     | LPDAK      | QAQIT | TRY (5)  | SA   | ID       | AVV      |       |        |       |       |       |
| 6016553  | SI (8)  | VLVALE  | EQQ  | SPEIAAGVDR (6)     | VGAGDQGLMF     | SYATDE     | TEETMLPT              | ---LILSHKIN | AELHK       | RRN     | ---GTLPLWR | LPDPSK     | SOVT  | TRY (10) | R    | VH       | TVV      |       |        |       |       |       |
| 22095828 | GM (7)  | TLSCI   | HAQQ | SPDIAMGVDI         | ---GAGDQGLMF   | CAVRE      | EELMPLA               | ---LVLRSRE  | ILV         | KLTNM   | KS         | ---NEIEWAR | PDQ   | KS       | SOVT | LAY (6)  | DH       | VDSIV |        |       |       |       |
| 13357974 | DF      | ---TIIS | SNV  | NSQ                | SVDAIQSVNK (5) | IGAGDQGLIV | SYACDE                | TEQYMLPT    | ---TVLAHELL | KEIEK   | QRN        | ---KEFVKI  | QADM  | KS       | SOV  | IDY (5)  | V        | LETML |        |       |       |       |
| 2500686  | DF (2)  | LSCIN   | NSQ  | SEIINQGV           | SNDIEI         | GAGDQGITV  | SYACSE                | TEQYMLPLG   | ---SIVAQAL  | QRAARI  | ---I       | ---DQYPF   | FKHDM | KS       | SOV  | VLN (4)  | VQ       | CE    | SVL    |       |       |       |
| 3334428  | VL (11) | DCRI    | GGQ  | SMDLVDV            | FER (5)        | PLANDT     | SFGV                  | YAPLS       | HTER        | LVLETER | FLNS       | DELKNE     | IP    | PAV      | GED  | ---IKVMG | REG      | KIT   | LTIAM  | ---AV | DRYV  |       |
| 21646472 | NL (11) | QNEI    | KPG  | SPELTD             | AERK           | VIGAND     | T                     | SVGV        | YAPF        | SETER   | IVLATE     | QFLNS      | PALKE | FP       | EAG  | ED       | ---VKIMG | CRNGR | KLOLIT | VAV   | ---AF | VDREI |

| gi#      | species | sssss | hhhhhhhhhh | hh    | sss   | 230*    | 238*  | 244*    | 245* | 265    | 269      | 271    |        |      |      |        |       |        |    |           |           |        |        |     |        |        |    |    |    |    |    |    |    |
|----------|---------|-------|------------|-------|-------|---------|-------|---------|------|--------|----------|--------|--------|------|------|--------|-------|--------|----|-----------|-----------|--------|--------|-----|--------|--------|----|----|----|----|----|----|----|
| 46015497 | LST     | QHSE  | EIDQK      | SLQEA | VMEI  | IKP     | ---IL | ---PAEW | TT   | ---SA  | ---TKFF  | INPT   | GRFVIG | GPMD | CDCL | TL     | GRKII | VD     | TY | ---GGMARH | ---GGG    | AFS    | CKD    | PS  | ---KVD |        |    |    |    |    |    |    |    |
| 400245   | ISV     | QHDE  | VEVCL      | DEMR  | DALKE | KVIKA   | ---VV | ---PAKY | D    | ---ED  | ---TIYHL | QPS    | GRFVIG | GPQ  | DA   | GL     | TL    | GRKII  | VD | TY        | ---GGWGAH | ---GGG | AFS    | CKD | YT     | ---KVD |    |    |    |    |    |    |    |
| 15836994 | LST     | QHPDG | IKQ        | DLVA  | ELRE  | EILK    | ---VL | ---PSKW | H    | ---KG  | ---TKFH  | INPT   | GKRVIG | GGP  | ED   | CL     | TL    | GRKII  | VD | TY        | ---GGSARH | ---GGG | AFS    | CKD | PS     | ---KVD |    |    |    |    |    |    |    |
| 6016553  | VST     | QHSP  | DVTL       | EKLRE | TILAD | VIKK    | ---VI | ---PASL | D    | ---ES  | ---TVFH  | INPC   | TRFIVG | GGP  | DA   | GT     | TL    | GRKII  | VD | TY        | ---GGWGAH | ---GGG | AFS    | CKD | PT     | ---KVD |    |    |    |    |    |    |    |
| 22095828 | VSV     | QHD   | DTTH       | DEIE  | KIV   | EVV     | ---VL | ---EKYN | S    | ---SDN | ---TKYY  | INPT   | GRFVIG | GGH  | ED   | TL     | GRKII | VD     | TY | ---GGYFKH | ---GGG    | AFS    | CKD    | PS  | ---KVD |        |    |    |    |    |    |    |    |
| 13357974 | VSI     | QHDE  | DYNI       | IEYFN | KKVS  | ---TIMD | ---LA | ---IKYG | N    | ---TD  | ---FKKI  | INSS   | GRFVIG | GGP  | ED   | TL     | GRKII | VD     | TY | ---GGIGHH | ---GGG    | AFS    | CKD    | PT  | ---KVD |        |    |    |    |    |    |    |    |
| 2500686  | MSV     | QHTQ  | QDVS       | LDQL  | RQTI  | INQV    | ---VL | ---TEYG | N    | ---DPK | ---IKHL  | VN     | PGSS   | FV   | GGP  | AD     | TL    | GRKII  | VD | TY        | ---GPYANH | ---GGG | SFS    | CKD | PT     | ---KVD |    |    |    |    |    |    |    |
| 3334428  | KNIE    | YK    | EV         | IEK   | VRRK  | VE      | ---LA | (7)     | HINT | AD     | DYER     | ---ESV | YLT    | VT   | ETS  | ---AEM | DD    | SV     | GR | NR        | ---NGL    | IT     | PF     | FR  | PM     | ---SME | AA | AK | NV | HN | VG |    |    |
| 21646472 | PNAN    | HY    | FER        | KSAL  | RHEL  | LSFT    | ES    | QSCNI   | (5)  | DINS   | ---D     | ---DP  | (4)    | EG   | VYLT | VT     | ETS   | ---AEG | DD | GV        | GR        | NR     | ---NGL | IA  | FN     | R      | Q  | TM | AA | AK | NV | HN | VG |

| gi#      | species   | hhhhh---hhhhhhhhhh | sssssss | sss  | hhhhhhhhh | hhh   |      |      |       |       |       |      |      |     |     |       |      |     |    |    |     |      |     |     |         |         |        |        |    |        |        |      |        |       |      |     |    |     |      |     |    |
|----------|-----------|--------------------|---------|------|-----------|-------|------|------|-------|-------|-------|------|------|-----|-----|-------|------|-----|----|----|-----|------|-----|-----|---------|---------|--------|--------|----|--------|--------|------|--------|-------|------|-----|----|-----|------|-----|----|
| 46015497 | RSAA      | Y---AAR            | VAKN    | IVAA | GLADR     | CEIQV | SYA  | IGV  | ---AE | TSIM  | VET   | FGT  | EKV  | PSE | QL  | TL    | LV   | RE  | FF | DL | RPY | GLI  | LI  | QML | LD      | LLH (5) | TAAY   | G (23) | LK |        |        |      |        |       |      |     |    |     |      |     |    |
| 400245   | RSAA      | Y---AAR            | VWAK    | IVK  | GLCR      | RRVL  | QV   | SYA  | IGV   | ---SH | PLSIS | IFHY | TSQK | SER | RE  | LE    | IV   | KKN | FD | LR | PGV | IV   | RD  | LD  | LKK (5) | TAAY    | G (15) | KY     |    |        |        |      |        |       |      |     |    |     |      |     |    |
| 15836994 | RSAS      | Y---AVR            | VAKN    | VAA  | GLADR     | CEIQV | SYA  | IGV  | ---AE | ISIS  | VTF   | FGT  | GKI  | SDD | KI  | EL    | KL   | RF  | DF | DL | RPY | GI   | IK  | ML  | DLH (5) | SASY    | G (39) | KI     |    |        |        |      |        |       |      |     |    |     |      |     |    |
| 6016553  | RSAA      | Y---AAR            | VWAK    | IVK  | GLAK      | RRVL  | QV   | SYA  | IGI   | ---AK | ISVL  | VY   | AF   | T   | SPL | ---DE | EL   | HQ  | IV | ED | SFL | PGKI | IK  | EL  | DLR (5) | TAENG   | G (15) | KL     |    |        |        |      |        |       |      |     |    |     |      |     |    |
| 22095828 | RSAA      | Y---AAR            | VWAK    | IVAA | ELAD      | KCEIQ | LSYA | IGV  | ---PK | VSVK  | VD    | TF   | GTSK | V   | DE  | DK    | ISEA | V   | SK | V  | FD  | LS   | PR  | GI  | EKA     | LE      | LR (7) | LA     | AF | G (24) | EL     |      |        |       |      |     |    |     |      |     |    |
| 13357974 | RSAS      | Y---FAR            | VAKN    | VAA  | KLAK      | QCEIQ | LAF  | IA   | ---PQ | VAMF  | VNT   | FFK  | NLV  | DE  | KKI | FEA   | IN   | S   | FN | FD | IK  | F    | IND | LE  | LWD (5) | VATY    | G (23) | SK     |    |        |        |      |        |       |      |     |    |     |      |     |    |
| 2500686  | RTGAY     | Y---FAR            | FAK     | HIV  | SL        | GWAE  | CEV  | SV   | SWFS  | Q     | ---PL | QK   | Q    | V   | KN  | IF    | N    | KE  | FS | Q  | LN  | IV   | IS  | QV  | F       | N       | WS     | VAKI   | IA | KL     | LD (6) | YAVY | G (22) | KN    |      |     |    |     |      |     |    |
| 3334428  | KIYNI     | Y---L              | NL      | NA   | IV        | AK    | LE   | Y    | KE    | CV    | YR    | IL   | SQ   | TK  | P   | NE    | K    | ALD | LE | IT | ED  | S    | --- | D   | IK      | D       | IE     | PK     | AE | TAN    | K      | W    | LD     | N (1) | ME   | VQ  | K  | --- | MIVE | KVT | TF |
| 21646472 | KIYNV (4) | L                  | ARRI    | HRE  | TE        | GEV   | ---  | VSVT | V     | FL    | CSQ   | TK   | PK   | VDR | LM  | AS    | ARIT | TP  | EP | GA | NMA | EL   | Q   | RS  | ATS     | I       | D      | RE     | LD | GI     | ---    | DA   | FQ     | ---   | KLAD | --- | EF |     |      |     |    |
