# Supplementary material for: Natural history of S-adenosylmethionine-binding proteins
Source: Springer Nature journal article supplement (doi:10.1186/1472-6807-5-19), 2005-10-14
Supplement: 12900_2005_52_MOESM7_ESM.pdf [file 12900_2005_52_MOESM7_ESM.pdf]

sssssssss hhhhhhhhhhhhhhhhh ssssss-----sss s-----ssssssss hh---hhh---hhhhhhhhh  
 46015497 A (1) -KHLFTSESVSE**HPDKIADQ**SDAVLDAILE---QDPKAR**ACET**---YVKTGM---VLVGG**EITSAWVD**---IEE---ITRNTV**REIGYVHS**  
 400245 IEEGGTFLLFTSESVSE**HPDKICDQ**SDAVLDAHLQ---QDPDAK**ACET**---VAKTGM---ILLAGE**ITSRRAVD**---YQK---VVREAVKH**IGYDSS**  
 15836994 M (2) -SYLFTSESVSE**HPDKVADQ**SDAVLDAILV---QDPRAR**ACET**---MVKTGV---AIIAGE**ITSAWVD**---LEA---LTRKWL**IRLIGYNS**  
 6016553 M (2) SKFLFTSESVSE**HPDKMCDQ**SDAVLDAHLK---QDPNAK**ACET**---VTKTGM---VMLCG**EITSKAVVD**---YQV---LVRRV**IEIKIGFTDS**  
 22095828 M (2) KFTYFTSEFVSG**HPDKISDQ**SDAILDAACLK---DDPNRS**ACEV**---FCTTGL---VVVGG**EITSTSYID**---VQD---IVRKK**IDEPYGRP**  
 13357974 M (2) YKKIITSESVGA**HPDKICDQ**SDAILDECLA---QDKNSR**ACEV**---LACNRL---IMVAGE**ITTHAYVD**---VVK---TAWEI**KPLGYNEN**  
 2500686 H (2) RWGRYVAEAVGR**HPDKICDQ**SDAILDEICK---QSPTSH**ACEV**---FASKNL---IMVGG**EITITGYVD**---VVQ---TAGWV**IRLIGYTES**  
 3334428 M (16) RPTEIVERKGL**HPDSICDG**AESVSRALCK (13) TDQVEL**GGHA** (8) MVSP**IIY**---ILLSGRAT**MEILDK** (4) VIK (5) TAV**KAAKE**---YL**KK**  
 21646472 P (16) QPFELVERKGL**HPDITICDS**MEAVCIDLCR (13) IDKGLL**VAGRS**---LPKTGG (7) KLIF**GD**RAT**YT**CNG (4) VGE---IAE**AAAKR**---W**IRE**

p P + P

m

k

163\*

165\*

sssssss hhhhhhhhhhhhhhhhh sssssss hh---hhhhhhhhhhhhhhhh sssssssssssss sssssss  
 46015497 DM (8) VLSAIGKQ**SPDINQGVDR** (5) QGAG**QGLMF**GYATNE**TDV**LMPAP---IT**Y**AHRV**VQQA**EV**RKN**---G**TLP**PWLR**PD**AKS**QVTFQY** (5) VG**TD**AVV  
 400245 SK (8) VLVALEQQ**SPDIAQGVHL** (6) IGAG**QGLMF**GYATNE**TEEC**MLPT---IV**L**AHKLN**AQ**LA**ELR**RN---G**TLP**PWLR**PD**SK**TQVTVQY** (10) RV**HT**IV  
 15836994 DV (8) VLNLIGKQ**SPDINQGVDR** (5) QGAG**QGLMF**GYATNE**TD**SYMPAA---IH**I**SHR**LVEQ**AK**IRK**KSNS**PLR**PD**AKQIT**LR**Y** (5) SA**TD**AVV  
 6016553 SI (8) VLVALEQQ**SPETIAAGVHV** (6) VGAG**QGLMF**GYATNE**TEET**MLPT---L**IL**SHK**INA**EL**HLR**RN---G**TLP**PWLR**PD**AKS**QV**TYE**Y** (10) RV**HT**IV  
 22095828 GM (7) TLSC**THAQ**SP**DIAM**GV**DI**---GAG**Q**Q**GIM**FG**AVR**TE**ELM**PLA---LV**L**SRE**ILV**KL**TN**MM**KS**---NE**IE**WAR**PD**Q**SQV**TL**AY** (6) DH**VD**SIV  
 13357974 DF---TIISNVKQ**SVDAIQSVNK** (5) IGAG**Q**Q**GIV**FG**AC**DE**T**EQ**Y**MLPT---TV**L**AHEL**LK**E**IE**K**QR**RN---KE**F**V**KI**Q**AD**MS**QV**S**ID**Y (5) -V**IE**TM**L**  
 2500686 DF (2) -L**SC**IN**QAV**Q**S**NDE**IE**AG**Q**Q**IT**VG**YAC**SE**T**EQ**Y**ML**PLG**---S**IV**AQ**L**V**Q**AA**RI**-I---D**Q**Y**PF**IK**HM**KS**QV**VL**NY** (4) V**Q**CE**S**VL  
 3334428 VL (11) D**CR**IG**Q**Q**MD**L**VD**VE**R** (5) P**L**AN**D**TS**F**GV**EY**AP**LS**TER**IV**LE**TER**FN**S**Q**L**KN**E**IP**AV**GED---IK**VM**L**RE**G**K**IT**IT**IA**M**---A**V**DR**Y**  
 21646472 NL (11) Q**NE**IK**PG**SP**EL**TD**AF**ARK-VI**GN**D**TS**VG**VY**AP**FS**ET**ER**IV**L**A**TE**Q**FL**NS**P**AL**K**E**F**PE**AG**ED---V**K**IM**G**CR**NR**GR**KLQ**LT**IV**AV---A**F**VD**R**FI

m

maa

230\*

238\*

244\*

245\*

265

269

271

R P

sssss hhhhhhhhhhh hhh sss ss  
 46015497 L**STQ**SE**IE**ID**Q**KS**LQ**EA**VM**E**IE**IK**P**--**IL**---PAEW**T**--SA---TK**FF**IN**PT**CR**F**VI**GG**PM**GD**CL**TR**K**II**DT**Y**-GG**M**AR**H**-GG**G**AF**SK**GD**S**-**K**VD  
 400245 I**SVQ**H**DE**VC**L**DM**RD**AL**KE**K**V**IK**A**--**VV**---PAKY**D**-ED---TI**Y**HL**Q**PS**R**F**VI**GG**PQ**DA**LT**ER**K**II**DT**Y-GG**W**GA**H**-GG**G**AF**SK**GD**Y**T-**K**VD  
 15836994 L**STQ**HP**GI**K**Q**DL**VE**AV**RE**E**IE**IK**P**--**VL**---PSKW**H**--KG---TK**F**HN**PT**CK**F**VI**GG**V**GD**CL**TR**K**II**DT**Y**-GG**S**AR**H**-GG**G**AF**SK**GD**S**-**K**VD  
 6016553 V**STQ**SP**VD**TL**E**KL**RE**TI**L**AD**V**IK**K**--**VI**---PASL**D**-ES---TV**F**HN**PC**GT**F**VI**GG**PM**EDA**VT**ER**K**II**DT**Y**-GG**W**GA**H**-GG**G**AF**SK**GD**T**-**K**VD  
 22095828 V**SVQ**H**ED**DT**H**DE**IE**K**I**VE**K**V**VP**--**VI**---EK**YN**S-SD**N**---IK**Y**IN**PT**ER**F**VI**GG**PH**GD**VT**ER**K**II**DT**Y**-GG**Y**FK**H**-GG**G**AF**SK**GD**S**-**K**VD  
 13357974 V**SIQ**H**ED**ED**Y**NI**EY**FN**K**K**V**S-T**IM**D**Q**--**IA**---IK**Y**GN--TD---FK**K**II**NS**SR**F**VI**GG**PI**ED**TL**ER**K**II**DT**Y**-GG**I**GH**H**-GG**G**AF**SK**GD**T**-**K**VD  
 2500686 M**SVQ**HT**Q**DV**SL**D**Q**LR**QT**I**IN**Q**V**IL**P**--**VL**---TE**Y**GN-D**PK**---IK**H**LV**NP**GS**R**F**VI**GG**PM**AD**TL**ER**K**II**DT**Y-G**P**Y**AN**H-GG**G**S**F**SK**D**T-**K**VD  
 3334428 K**NI**E**Y**KE**V**-I**E**K**V**R**K**V**E**-ED**L**AK**K**--**IA** (7) H**IN**TAD**D**Y**ER**--E**S**V**Y**LT**VT**GT**S**---A**EM**GD**D**SV**GR**GN**R**NG**L**IT**PF**RP**M**-S**ME**AA**E**KN**V**HN**H**V  
 21646472 P**N**AN**H**Y**ER**-K**S**AL**R**H**EL**L**S**Q**IES**Q**S**C**NI** (5) D**IN**S**D**--D**P** (4) E**GV**Y**L**TV**L**TS**S**---A**EG**D**G**Q**V**ER**GN**R**NG**L-I**A**F**NR**N**Q**T**ME**AA**E**KN**V**HN**H**V

a

a a AA a

mRK

PP

P

P

K +

hhhhh---hhhhhhhhhh sssssss ssss hhhhhhhhh hhh  
 46015497 R**SA**AY---A**R**V**V**AK**N**IV**A**GL**ADR**CE**I**Q**V**SY**A**IG**V**--A**E**TS**I**M**V**ET**FG**TE**KV**-P**SE**Q**T**LL**V**RE**FF**D**L**R**PY**GL**I**Q**ML**D**L**L**H** (5) T**AA**Y (23) L**K**  
 400245 R**SA**AY---A**R**W**V**AK**S**IV**K**GL**CR**R**V**L**V**Q**V**SY**A**IG**V**--S**H**LS**I**S**I**F**H**Y**GS**Q**K**-S**ER**EL**L**E**I**V**K**N**F**D**L**R**PG**V**IR**D**L**D**L**K**H** (5) T**AA**Y (15) **KY**  
 15836994 R**SA**Y---A**R**V**V**AK**N**V**A**GL**ADR**CE**V**Q**V**SY**A**IG**V**--A**E**IS**I**S**V**ET**FG**T**G**K**I**-S**DK**LE**K**L**I**R**Q**H**FD**L**R**PY**G**I**K**M**L**D**L**H (5) S**AS**Y (39) **KL**  
 6016553 R**SA**AY---A**R**W**V**AK**S**IV**K**GL**AK**R**V**L**V**Q**V**SY**A**IG**I**--A**K**IS**V**L**V**Y**A**FT**S**PL**-D**E**EL**L**H**Q**IV**S**FD**LT**PG**K**I**KE**L**D**L**K**R** (5) T**AE**NS (15) **KI**  
 22095828 R**SA**AY---A**R**W**V**AK**N**IV**A**E**L**AD**K**CE**I**Q**L**SY**A**IG**V**--P**K**V**S**V**K**V**D**ET**FG**T**SK**V-DE**DK**SE**AV**SK**V**FD**L**S**PR**G**E**KA**L**E**L**RE (7) L**AA**F (24) **EL**  
 13357974 R**SA**Y---F**AR**W**V**AK**N**V**V**AK**L**AK**Q**CE**I**Q**L**A**F**IG**E**--P**Q**V**AM**F**V**NT**FK**N**L**V-DE**KK**I**F**E**A**IN**K**S**F**N**F**IK**T**F**I**ND**L**E**L**WT (5) V**AT**Y (23) **SK**  
 2500686 R**T**GA**Y**---F**AR**FI**AK**H**IV**SL**GW**A**EE**CE**V**S**W**F**S**Q**-P**LE**Q**S**I**Q**V**K**CF**IN**K**E**S**Q**L**IN**Q**V**I**S**Q**F**N**W**S**V**AK**I**AK**L**K**L**D** (6) Y**AV**Y (22) **KN**  
 3334428 K**I**Y**NI**---L**N**L**I**ND**I**AK**L**E**Q**V**K**E**C**Y**R**IL**S**Q**IK**P**IN**E**K**AL**D**IE**IT**ED**S**Y-D**IK**D**IE**PK**AI**E**AN**K**W**LD**NI**---M**EV**Q**K**---M**IV**E**K**VT-T**F**  
 21646472 K**I**Y**N**V (4) L**AR**RI**H**RE**TE**GV---**V**SV**T**V**F**L**S**Q**IG**K**P**V**DR**EL**M**AS**AR**IT**PE**PG**A**-N**MA**EL**Q**SR**ATS**I**D**RE**L**D**GI**---D**AF**Q**Q**---K**L**AD**S**----**E**F
