# Supplementary figures and images for: Natural history of S-adenosylmethionine-binding proteins
Source: Springer Nature journal article supplement (doi:10.1186/1472-6807-5-19), 2005-10-14

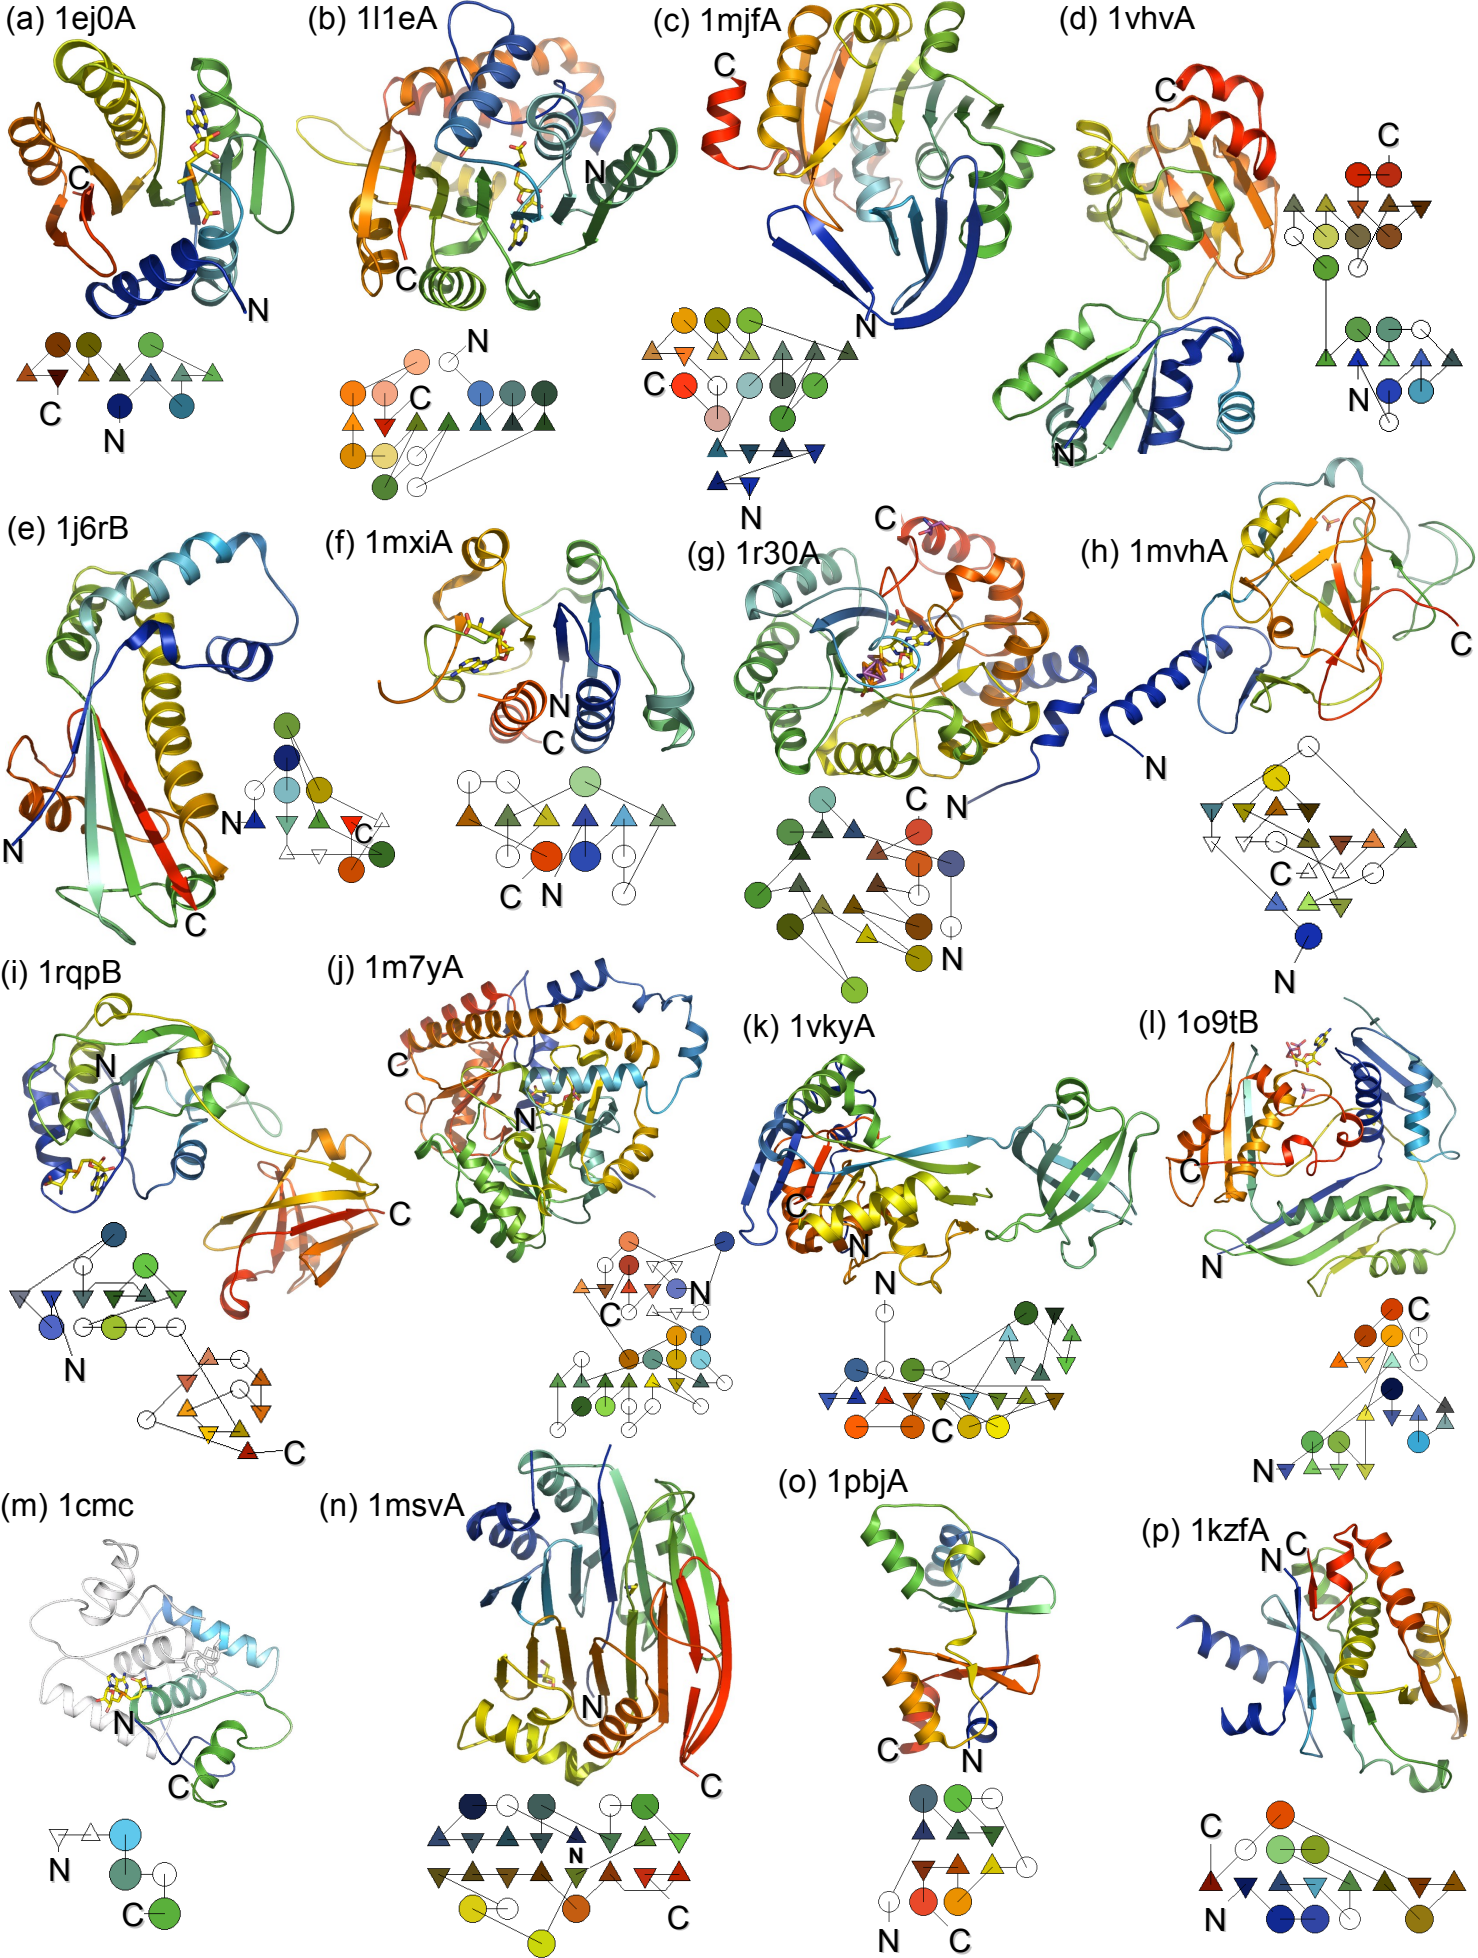

Supplement: 12900_2005_52_MOESM1_ESM.pdf [file 12900_2005_52_MOESM1_ESM.pdf]
